# Supplementary material for: Pim1 promotes IFN-β production by interacting with IRF3
Source: Springer Nature journal article supplement (doi:10.1038/s12276-022-00893-y), 2022-11-29
Supplement: MOESM1 [file 12276_2022_893_MOESM1_ESM.pdf]

## **Supplemental Information**

### **Pim1 promotes IFN- $\beta$ production by interacting with IRF3**

**(Running title: Positive regulation of IFN- $\beta$  production by Pim1)**

Ryeojin Ko<sup>1,2</sup>, Jeongin Seo<sup>1</sup>, Hana Park<sup>1</sup>, Nawon Lee<sup>1</sup> and Soo Young Lee<sup>1,2,\*</sup>

<sup>1</sup>Department of Life Science, Ewha Womans University, Seoul 03760, Korea.

<sup>2</sup>The Research Center for Cellular Homeostasis, Ewha Womans University, Seoul 03760, Korea.

\*Correspondence should be addressed to:

SY Lee, Department of Life Science and the Research Center for Cellular Homeostasis, Ewha Womans

University, Seoul 03760, South Korea. Tel: 82-2-3277-3770; Fax: 82-2-3277-3760; E-mail: leesy@ewha.ac.kr

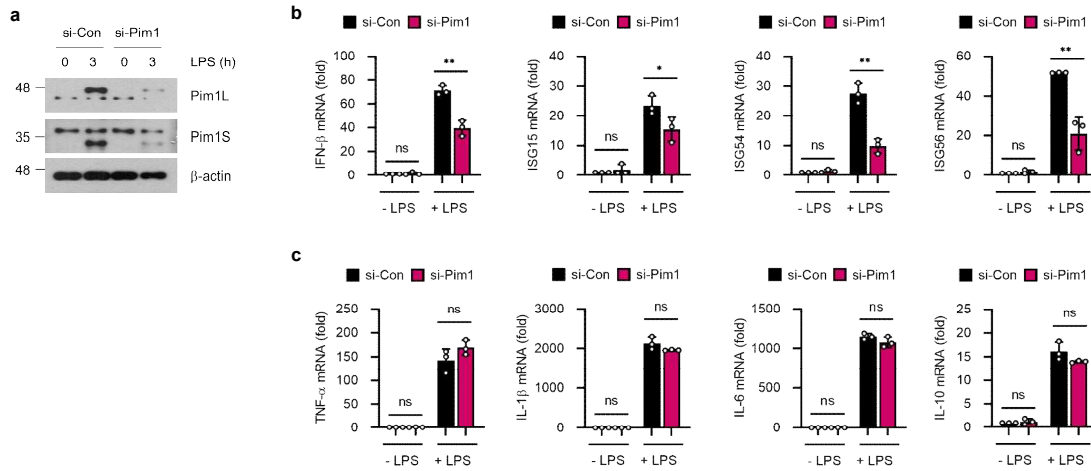

**Supplementary Fig. 1. Pim1 positively regulates TLR-mediated antiviral gene expression.**

**a-c**, Effect of Pim1 silencing. BMDMs were transfected with control siRNA (si-Con) or Pim1-specific siRNA (si-Pim1) and treated with LPS (100 ng ml<sup>-1</sup>) for 3 h, after which Pim1 (**a**), IFN-β, ISG15, ISG54, ISG56 (**b**), or TNF-α, IL-1β, IL-6 and IL-10 (**c**) expression was determined by immunoblot analysis (**a**) or RT-qPCR (**b,c**). All mRNA values were normalized to β-actin mRNA expression. All data are expressed as mean ± s.d. and represent at least three independent experiments with similar results. \**p* < 0.05, \*\**p* < 0.01, as determined by two-tailed Student's *t*-test.

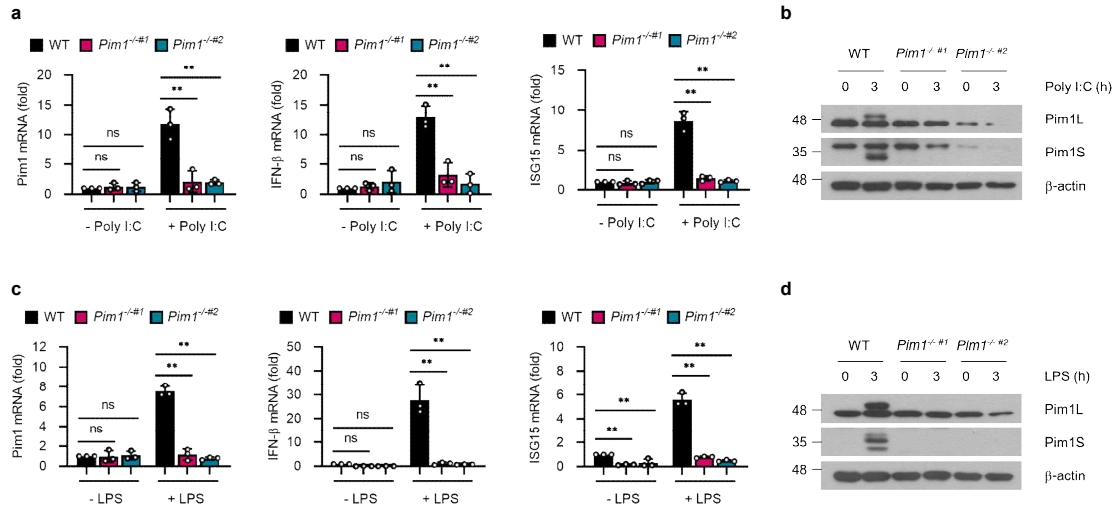

**Supplementary Fig. 2. Pim1 deficiency reduces TLR-mediated antiviral gene expression in RAW264.7 cells.**

Two *Pim1*<sup>-/-</sup> RAW264.7 cell clones were generated. Both *Pim1*<sup>-/-</sup> clones and WT RAW264.7 cells were subjected to TLR stimulation with LPS (**a,b**) or poly I:C (**c,d**) for the indicated times, after which Pim1, IFN-β or ISG15 RT-qPCR (**a,c**) or Pim1 immunoblot (**b,d**) was conducted. All mRNA values were normalized to β-actin mRNA expression. All data are presented as mean ± s.d. and represent at least three independent experiments with similar results. \**p* < 0.05, \*\**p* < 0.01, as determined by two-tailed Student's t-test.

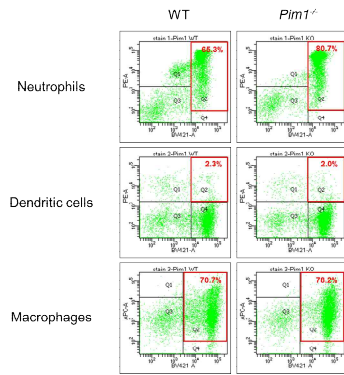

### Supplementary Fig. 3. Characterization of *Pim1*<sup>-/-</sup> mice.

Flow cytometric analysis of bone marrow cells from WT and *Pim1*<sup>-/-</sup> mice at 8 weeks of age to determine neutrophil (CD11b/Gr1+), dendritic cell (CD11b/CD11c+) and macrophage (CD11b/F4/80+) frequencies. All data represent at least two independent experiments with similar results.

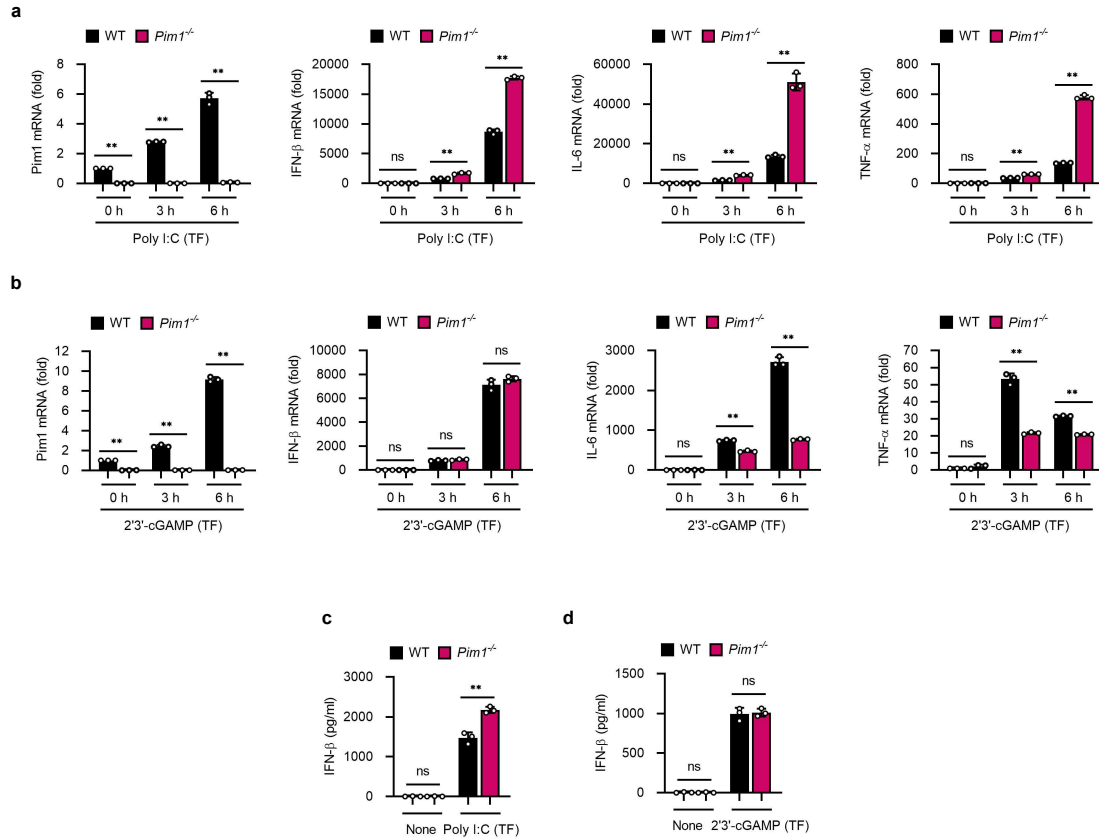

**Supplementary Fig. 4. Pim1 differentially regulates RLR- and cGAS-mediated responses in macrophages.**

WT or *Pim1*<sup>-/-</sup> BMDMs were transfected with poly I:C (10  $\mu\text{g ml}^{-1}$ ) (**a,c**) or 2'3'-cGAMP (10  $\mu\text{g ml}^{-1}$ ) (**b,d**) for up to 6 h. **a,b**, RT-qPCR of Pim1, IFN-β, IL-6 and TNF-α at the indicated times. mRNA values were normalized to β-actin mRNA expression. **c,d**, IFN-β levels in the supernatants at 6 h. All data are presented as mean  $\pm$  s.d. and represent at least three independent experiments with similar results. \*\* $p < 0.01$ , as determined by two-tailed Student's t-test.

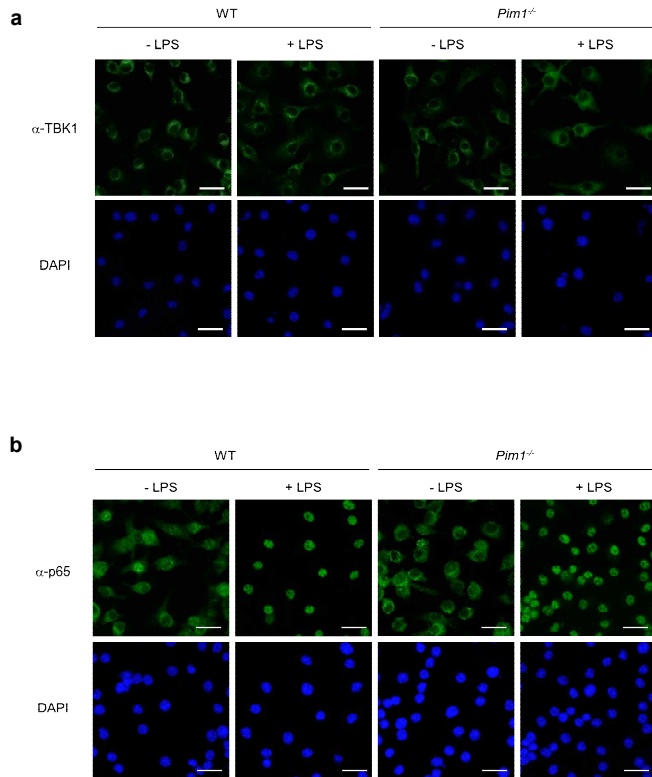

**Supplementary Fig. 5. Pim1 does not alter TBK1 localization or NF-κB nuclear translocation.**

**a,b**, Immunostaining of TBK1 (**a**) and NF-κB p65 (**b**) in WT or *Pim1*<sup>-/-</sup> BMDMs treated with LPS (100 ng ml<sup>-1</sup>) for 1 h. Nuclei were counterstained with DAPI. Scale bars represent 10 μm. Data are representative of at least two independent experiments with similar results.

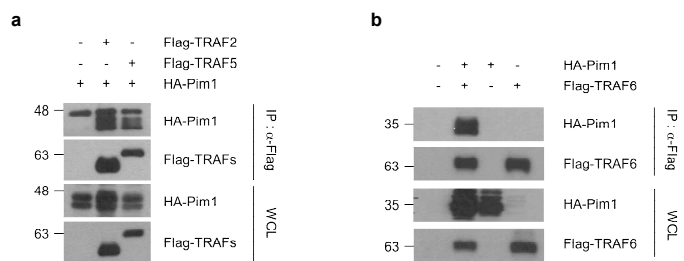

**Supplementary Fig. 6. Pim1 co-immunoprecipitates with other TRAFs.**

**a,b**, HEK293T cells were transfected with distinctly tagged Pim1 and TRAF2, TRAF5 (**a**), or TRAF6 (**b**) and then subjected to immunoprecipitation analyses using tag-specific antibodies. All data represent at least two independent experiments with similar results.

**Supplementary Table 1. Sequences of qRT-PCR primers**

| Gene           |   | Sequence (5'→3')        |
|----------------|---|-------------------------|
| Pim1           | F | CGCGACATCAAGGACGAGAACA  |
|                | R | CGAATCCACTCTGGAGGACTGT  |
| Pim2           | F | CTGCTTCACGATGAGCCGTACA  |
|                | R | GAGTAGGACACCTAGTGACCAG  |
| Pim3           | F | TGTGGTCTCTGGGTGTACTGCT  |
|                | R | GACACCACTCAATAAGCTGCTGG |
| $\beta$ -actin | F | CATTGCTGACAGGATGCAGAAGG |
|                | R | TGCTGGAAGGTGGACAGTGAGG  |
| IFN- $\beta$   | F | GCCTTTGCCATCCAAGAGATGC  |
|                | R | ACACTGTCTGCTGGTGGAGTTC  |
| ISG15          | F | CATCCTGGTGAGGAACGAAAGG  |
|                | R | CTCAGCCAGAACTGGTCTTCGT  |
| ISG54          | F | CGAACTACCGTCTGGATGACTG  |
|                | R | CTTCAACCAGCGCCATTGCTTG  |
| ISG56          | F | TACAGGCTGGAGTGTGCTGAGA  |
|                | R | CTCCACTTTCAGAGCCTTCGCA  |
| TNF- $\alpha$  | F | GGTGCCTATGTCTCAGCCTCTT  |
|                | R | GCCATAGAACTGATGAGAGGGAG |
| IL-1 $\beta$   | F | TGGACCTTCCAGGATGAGGACA  |
|                | R | GTTCATCTCGGAGCCTGTAGTG  |
| IL-6           | F | TACCACTTCACAAGTCGGAGGC  |
|                | R | CTGCAAGTGCATCATCGTTGTTC |
| IL-10          | F | CGGGAAGACAATAACTGCACCC  |
|                | R | CGGTTAGCAGTATGTTGTCCAGC |
